# Supplementary material for: [Retracted] Retrospective Case Analysis of 104 Cases of Talipes Equinus
Source: Hindawi journal article supplement (doi:10.1155/2022/9769092), 2022-01-01
Supplement: f1 [file 9769092.f1.pdf]

| ID        | gender | birthplace  | Affected si | Age (Number) at First Vi |
|-----------|--------|-------------|-------------|--------------------------|
| 6023244-2 | female | county town | bilateral   | 13                       |
| 5872966-3 | female | rural area  | left        | 6                        |
| 6019240-2 | male   | urban area  | right       | 38                       |
| 5288552-4 | male   | urban area  | right       | 59                       |
| 6002151-3 | female | urban area  | right       | 118                      |
| 6000228-3 | female | urban area  | right       | 7                        |
| 6026896-2 | male   | urban area  | right       | 5                        |
| 6018745-4 | male   | rural area  | left        | 30                       |
| 6085119-2 | male   | rural area  | bilateral   | 54                       |
| 6004952-3 | male   | rural area  | right       | 118                      |
| 6023586-3 | male   | urban area  | left        | 39                       |
| 5955299-2 | female | rural area  | left        | 25                       |
| 6010105-4 | male   | rural area  | right       | 54                       |
| 4801766-4 | male   | rural area  | right       | 36                       |
| 5902598-3 | male   | rural area  | bilateral   | 2                        |
| 6002426-4 | male   | rural area  | bilateral   | 14                       |
| 6100889-4 | female | urban area  | right       | 5                        |
| 5995369-2 | male   | urban area  | right       | 8                        |
| 6078395-4 | male   | rural area  | left        | 15                       |
| 5680207-4 | male   | rural area  | bilateral   | 35                       |
| 5666857-2 | male   | urban area  | right       | 26                       |
| 5686160-4 | male   | rural area  | left        | 41                       |
| 6032991-2 | male   | rural area  | bilateral   | 288                      |
| 6033915-4 | male   | urban area  | bilateral   | 8                        |
| 5890530-4 | male   | rural area  | bilateral   | 7                        |
| 5964065-2 | male   | rural area  | left        | 82                       |
| 4844573-2 | male   | rural area  | right       | 142                      |
| 6041813-4 | male   | county town | right       | 82                       |
| 6040479-4 | male   | rural area  | right       | 34                       |
| 6107033-3 | male   | rural area  | left        | 33                       |
| 6103174-3 | male   | rural area  | bilateral   | 3                        |
| 6100191-2 | female | urban area  | right       | 2                        |
| 6130304-3 | male   | rural area  | bilateral   | 42                       |
| 6112214-2 | male   | rural area  | bilateral   | 20                       |
| 6128910-2 | male   | rural area  | right       | 45                       |
| 6089541-2 | male   | urban area  | bilateral   | 41                       |
| 6131444-4 | male   | county town | right       | 44                       |
| 6115504-1 | male   | urban area  | right       | 17                       |
| 6179090-4 | female | urban area  | bilateral   | 40                       |
| 6124291-4 | male   | rural area  | bilateral   | 19                       |
| 4435788-2 | male   | county town | right       | 47                       |
| 5902391-2 | female | urban area  | left        | 44                       |
| 6106012-4 | female | rural area  | right       | 2                        |
| 6168621-4 | female | urban area  | right       | 3                        |
| 5897422-2 | male   | rural area  | left        | 34                       |
| 6513303-4 | male   | county town | bilateral   | 9                        |
| 6278951-2 | male   | rural area  | right       | 7                        |
| 6229405-2 | male   | rural area  | bilateral   | 31                       |
| 6501794-4 | male   | rural area  | right       | 34                       |
| 6079634-2 | female | rural area  | bilateral   | 27                       |
| 5314959-4 | male   | rural area  | right       | 3                        |
| 5676024-4 | male   | urban area  | bilateral   | 7                        |
| 6505906-4 | male   | urban area  | bilateral   | 18                       |
| 6193238-3 | male   | urban area  | left        | 69                       |
| 6553665-4 | male   | urban area  | right       | 23                       |
| 6534503-2 | male   | urban area  | right       | 11                       |
| 5922061-3 | female | rural area  | bilateral   | 41                       |

|           |        |             |           |     |
|-----------|--------|-------------|-----------|-----|
| 6508230-3 | female | urban area  | right     | 14  |
| 6581757-4 | male   | rural area  | bilateral | 8   |
| 4228614-4 | male   | county town | right     | 12  |
| 6569165-3 | male   | county town | left      | 5   |
| 5727246-2 | male   | rural area  | right     | 20  |
| 6319500-3 | male   | county town | bilateral | 42  |
| 6572762-4 | male   | county town | bilateral | 33  |
| 6607278-4 | male   | rural area  | right     | 19  |
| 6453897-4 | male   | urban area  | bilateral | 21  |
| 6296190-4 | male   | county town | left      | 33  |
| 6662899-4 | male   | county town | bilateral | 37  |
| 5930271-4 | female | rural area  | right     | 49  |
| 6124291-4 | male   | rural area  | bilateral | 19  |
| 6620441-4 | male   | county town | right     | 11  |
| 5876565-3 | male   | urban area  | right     | 28  |
| 6389750-4 | male   | county town | right     | 34  |
| 6226295-4 | male   | urban area  | left      | 15  |
| 6305937-3 | male   | county town | right     | 12  |
| 6607588-4 | male   | rural area  | right     | 60  |
| 6646705-4 | female | rural area  | left      | 92  |
| 6220587-3 | male   | urban area  | right     | 7   |
| 6223542-3 | female | county town | right     | 3   |
| 6607738-3 | male   | urban area  | right     | 25  |
| 6375066-4 | female | urban area  | bilateral | 40  |
| 6414627-2 | male   | rural area  | right     | 53  |
| 6601785-2 | male   | rural area  | left      | 133 |
| 6274493-4 | male   | urban area  | right     | 163 |
| 6660059-1 | male   | rural area  | bilateral | 20  |
| 6194828-4 | male   | rural area  | right     | 7   |
| 6089541-2 | male   | urban area  | right     | 43  |
| 6513303-4 | male   | county town | bilateral | 9   |
| 5679170-4 | female | urban area  | right     | 49  |
| 6589630-4 | female | urban area  | right     | 113 |
| 6695301-3 | male   | rural area  | right     | 39  |
| 6321764-3 | male   | urban area  | bilateral | 45  |
| 6689619-3 | male   | urban area  | bilateral | 23  |
| 5953778-2 | female | rural area  | left      | 8   |
| 5757900-4 | male   | rural area  | bilateral | 41  |
| 6695796-3 | male   | rural area  | bilateral | 7   |
| 6693705-2 | male   | urban area  | right     | 37  |
| 3811383-4 | male   | rural area  | bilateral | 57  |
| 6675182-4 | female | rural area  | right     | 111 |
| 6695796-3 | male   | rural area  | bilateral | 7   |
| 6165895-2 | male   | urban area  | bilateral | 70  |
| 6115504-1 | male   | urban area  | right     | 17  |
| 6090486-4 | female | county town | right     | 28  |
| 6695301-3 | male   | rural area  | right     | 39  |

| Gypsum correction | Brace compliance | recur |
|-------------------|------------------|-------|
|                   | 4 unknown        | none  |
|                   | 5 cooperated     | none  |
|                   | 3 unknown        | none  |
|                   | 5 unknown        | none  |
|                   | 3 cooperated     | none  |
|                   | 4 cooperated     | none  |
|                   | 4 cooperated     | none  |
|                   | 5 cooperated     | none  |
|                   | 4 cooperated     | none  |
|                   | 3 cooperated     | none  |
|                   | 3 cooperated     | none  |
|                   | 5 cooperated     | none  |
|                   | 3 cooperated     | none  |
|                   | 5 cooperated     | none  |
|                   | 6 cooperated     | none  |
|                   | 4 cooperated     | none  |
|                   | 2 cooperated     | none  |
|                   | 8 cooperated     | none  |
|                   | 5 cooperated     | none  |
|                   | 4 cooperated     | none  |
|                   | 4 cooperated     | none  |
|                   | 4 cooperated     | none  |
|                   | 7 cooperated     | none  |
|                   | 4 cooperated     | none  |
|                   | 4 cooperated     | none  |
|                   | 6 cooperated     | none  |
|                   | 4 cooperated     | none  |
|                   | 4 cooperated     | none  |
|                   | 5 cooperated     | none  |
|                   | 3 cooperated     | none  |
|                   | 4 cooperated     | none  |
|                   | 3 cooperated     | none  |
|                   | 4 cooperated     | none  |
|                   | 4 cooperated     | none  |
|                   | 4 cooperated     | none  |
|                   | 6 不cooperated    | yes   |
|                   | 4 cooperated     | none  |
|                   | 4 cooperated     | none  |
|                   | 3 cooperated     | none  |
|                   | 4 cooperated     | none  |
|                   | 3 cooperated     | none  |
|                   | 4 cooperated     | none  |
|                   | 3 cooperated     | none  |
|                   | 4 cooperated     | none  |
|                   | 4 cooperated     | none  |
|                   | 4 cooperated     | none  |
|                   | 3 cooperated     | none  |
|                   | 7 cooperated     | none  |
|                   | 3 不cooperated    | yes   |
|                   | 5 cooperated     | none  |
|                   | 6 cooperated     | none  |
|                   | 4 不cooperated    | yes   |
|                   | 3 cooperated     | none  |
|                   | 4 cooperated     | none  |
|                   | 4 cooperated     | none  |

|              |      |
|--------------|------|
| 6 cooperated | none |
| 4 cooperated | none |
| 5 cooperated | none |
| 4 cooperated | none |
| 3 cooperated | none |
| 3 cooperated | none |
| 4 cooperated | none |
| 4 cooperated | none |
| 4 cooperated | none |
| 3 cooperated | none |
| 3 cooperated | none |
| 3 cooperated | none |
| 4 cooperated | none |
| 5 cooperated | none |
| 4 cooperated | none |
| 4 cooperated | none |
| 4 cooperated | none |
| 5 cooperated | none |
| 5 cooperated | none |
| 5 cooperated | none |
| 4 cooperated | none |
| 4 cooperated | none |
| 3 cooperated | none |
| 4 cooperated | none |
| 3 cooperated | none |
| 3 cooperated | none |
| 4 cooperated | none |
| 6 cooperated | none |
| 3 cooperated | none |
| 4 cooperated | none |
| 3 cooperated | none |
| 6 cooperated | none |
| 2 cooperated | none |
| 3 cooperated | none |
| 4 cooperated | none |
| 2 cooperated | none |
| 6 cooperated | none |
| 7 cooperated | none |
| 3 cooperated | none |
| 3 cooperated | none |
| 7 cooperated | none |
| 3 cooperated | none |
| 3 cooperated | none |
| 2 cooperated | none |
| 4 cooperated | none |
| 5 cooperated | none |
| 3 cooperated | none |
